# Supplementary material
Source: PubMed Central journal article supplement (PMC3778548)
Supplement: supp_blood-2013-02-484444_blood-2013-02-484444-1.pdf [file supp_blood-2013-02-484444_blood-2013-02-484444-1.pdf]

## Supplemental Materials and Methods

### *Cell culture and maintenance of iPSCs*

Human fibroblast lines CHOPWT1 (Coriell GM00969), CHOPWT2 (Coriell GM05565), and BMC (ATCC CRL-2097) were cultured in IMDM (Mediatech) containing 10% FBS at 37°C and 5% CO<sub>2</sub> in a humidified incubator. The iPSCs were maintained in HES media: DMEM/F12 containing 2 mM of glutamine, 20% Knockout Serum Replacement (KO), 1X NEAA, 0.1 mM  $\beta$ -mercaptoethanol, and 10 ng/ml of bFGF (R&D Systems, Minneapolis, MN) on 0.1% gelatin (Sigma, Inc.) coated plates with irradiated mouse embryonic fibroblast (MEFs).

### *Lentivirus production and infection*

STEMCCA lentiviral vector production and infection followed the previously published protocol<sup>1</sup>. The STEMCCA viral vector used for Coriell fibroblast GM00969 and GM0565 reprogramming encoded OCT4, KLF4, SOX2, and mCherry cDNAs. The STEMCCA viral vector used for ATCC CRL-2097 reprogramming encoded OCT4, KLF4, SOX2, and cMYC cDNAs. Human fibroblasts were seeded at approximately  $3 \times 10^4$  cells per well of a 6-well plate and incubated with (5-10  $\mu$ l) STEMCCA virus plus 5 ug/ml of polybrene in fibroblast medium with a change in media 24h after infection. The medium was changed to IMDM with 10% FBS, 1x NEAA, 1x 1-glutamine, 1x-P/S, 20 ug/ml of ascorbic acid, and 4 ng/ml bFGF. GSK3-beta (EMD Biosciences; 5 uM) was added to the culture media on days 2-6 of reprogramming. Six days after infection, cells were replated on 100-mm plates containing MEFs. Cells were replated in IMDM media plus Thiazovivin (Stemgent, Boston, MA, 0.5 uM). The cells were maintained in IMDM with 10% FBS, 1x NEAA, 1x 1-glutamine, 1x-P/S, 50 ug/ml of ascorbic acid, and 4 ng/ml bFGF for 4-days post-splitting. Medium was changed to HES media on day 10 of reprogramming, and medium changes were performed every 2-3 days until day 28.

### *Initial iPSC expansion and characterization*

To establish iPSC lines, iPSC clones were handpicked about 1-month post-infection based on cell morphology and size. Clones were subsequently passaged and expanded in HES medium for a minimum of 20 passages to erase residual epigenetic memory<sup>2-3</sup>. Characterization of the clones included pluripotent ESC markers and qPCR analysis: DMNT3B, ABCG2, REX1, OCT4, SOX2, NANOG, cMYC, KLF4 gene expression. Flow cytometry was utilized to identify pluripotency antigens: SSEA3/4, TRA-1-81 and TRA-1-60.

### *RNA isolation and real-time quantitative PCR analysis*

Total RNA and miRNA were isolated from cells using the miRNeasy kit (Qiagen, Inc), with the optional column RNase-free DNase treatment, according to the manufacturer's instructions. The cDNA was produced using random hexamers with Superscript III Reverse Transcriptase (Invitrogen), from 200 ng to 1 ug of starting RNA. Human gDNA was used for the qPCR standard curve with a 10-fold gDNA dilution series, ranging from 0.1 to 10 ng per reaction to evaluate the efficiency of the PCR and calculate copy number of each gene relative to the housekeeping gene Cyclophilin. The expression level was expressed as number of molecules of RNA for each indicated gene per number of molecules of cyclophilin, following the protocol previously published.<sup>1</sup> Real-time quantitative PCR reactions were set up in

triplicate with the SYBR Green QPCR Master Mix (Roche, Indianapolis, IN, <http://www.roche.com>) and run on a Light Cycler 480II qPCR System (Roche, Indianapolis, IN, <http://www.roche.com>). Primer sequences are: CYCLOPHILIN: F' GAA GAG TGC GAT CAA GAA CCC ATG AC, R' GTC TCT CCT CCT TCT CCT CCT ATC TTT ACT T; DNMT3B: F' TAC AGA CGT GTG CAG TTG TAG GCA, R' GTG CAG ACT CCA GCC CTT GTA TTT; REX1: AAA GCA TCT CCT CAT TCA TGG T, R' TGG GCT TTC AGG TTA TTT GAC T; ABCG2: TCA GGA GAC CAC ATT TCA TCT AGC CC, R' CAG GGC ACC CAC TGA CAA ACT AAA; NANOG: F' CCT GAA GAC GTG TGA AGA TGA G, R' GCT GAT TAG GCT CCA ACC ATA C; OCT4: AAC CTG GAG TTT GTG CCA GGG TTT, R' TGA ACT TCA CCT TCC CTC CAA CCA, SOX2: AGA AGA GGA GAG AGA AAG AAA GGG AGA GA, R' GAG AGA GGC AAA CTG GAA TCA GGA TCA AA; KLF4: GAG GGA AGA CCA GAA TTC CCT TGA, R' AGA ACC AAG ACT CAC CAA GCA CCA; cMYC: F' ATG CAA CCT CAC AAC CTT GGC TGA, R' GCC CAA AGT CCA ATT TGA GGC AGT.

#### *Southern blot analysis*

Genomic DNA (10 ug, for hSTEMCCA vector Southern blot) was digested with BamHI, separated on a 0.8% agarose gel and blotted onto Hybond-N+ membrane (Amersham Biosciences). Membrane was probed using WRPE element as previously published<sup>16</sup>, and labeling was performed using <sup>32</sup>P- $\alpha$ -dCTP with the High Prime Random Labeling (Roche, Indianapolis, IN) following the manufacturer's instructions.

#### *Teratoma formation*

For teratoma formation, iPSCs were plated on a Matrigel-coated dish, and a minimum of 10<sup>6</sup> cells were injected subcutaneously into the neck of a Fox Chase SCID Beige mouse. Mice were sacrificed 6-9 weeks later, teratomas isolated and processed for histological analysis. The images were captured by the Zeiss Axioskop2 microscope (Munich, Germany) (Original magnification x20-40).

#### *Cre-mediated hSTEMCCA Excision*

Transgene removal was performed as previously published<sup>1</sup>. Briefly, iPSCs were plated on a matrigel-coated dish containing puromycin resistant irradiated MEFs. Cells were transfected with 2 ug/well of pHAGE2-Cre-IRES-PuroR plasmid DNA using Hela Monster transfection reagent (Mirus, Madison, Wi) according to manufacturer's instructions. Medium was changed to puromycin (1.2 ug/ml) selection medium 24 hours post-transfection for 48 hours. The re-emergence of iPSCs was observed between 7-10 days post-puromycin selection, and a total of 12 colonies were picked when colonies reached between 50-100 cells per cluster. Genomic DNA was collected using DNeasy Blood & Tissue kit (Qiagen, Valencia, CA) from each subclone after 2-3 weeks in culture and screened for hSTEMCCA transgene using the following primers and conditions: OCT4-Tg-F: 5'-GGT GCG CCA GTA AAG CAG ACA TTA AAC 3'; KLF4-Tg-R: 5'-CAG ACG CGA ACG TGG AGA AAG A-3' and GAPDH-F: 5'-GTG GAC CTG ACC TGC CGT CT-3'; GAPDH-R: 5'- GGA GGA GTG GGT GTC GCT GT-3'; 95°C for 10 minutes; followed by 30-cycles of 95°C for 30 seconds, and 60°C for 1 minute.

#### *Cell Sorting and Genetic analysis*

IPSCs and ESCs were grown to 85-90% confluence on MEFs plated on 1:6 Matrigel (BD Biosciences). In order to limit variability across culturing conditions, all cells were grown in

identical conditions; gelatin, matrigel, bFGF, FACS sorting antibodies, TrypLE, DMEM/F12 (50:50), and KOSR lots were fixed. Cells were disassociated with accutase for 4-min to remove MEFs, followed by an additional 10 min at RT to establish a single cell suspension. Cell counts and viability were assessed for all lines (>96%, respectively). Cells were pelleted and resuspended at  $5 \times 10^6$  cells/ml in staining medium (IMDM + 5% Knockout S/R + DNase). Cells were stained with SSEA3-FITC (1:100; Biolegend) and Tra-1-81-APC (1:100; Biolegend) antibodies for 30-min on ice. Cells were washed 2x and passed through a 70  $\mu$ m filter to remove clumps. Cells were sorted (FACS Aria II, Becton Dickinson), based on SSEA3-positive and Tra-1-81-positive expression (Figure 1A). The cells were resuspended in Qiazol and snap frozen for global gene array and miRNA analyses. All samples were stored in  $-80^\circ\text{C}$  until further analysis.

### *Gene Expression Analysis*

Three biological replicates were prepared for all iPSC and hESC-derived samples. Quantified RNA samples were hybridized to Affymetrix GeneChip Human Gene 1.0 ST arrays. The cells were analyzed for mRNA expression using Affymetrix GeneChip Human Gene 1.0 ST arrays. All gene array data obtained from Affymetrix passed quality control steps and were sent to RMA normalization and log transformation by Affymetrix Expression Console. Triplicate data were averaged and analyzed by Gene Cluster 3.0<sup>4</sup> for principal components assay (PCA) by excluding genes with expression levels lower than 5. PCA data were visualized with TreeView. Significance Analysis of Microarrays (SAM) was carried out to identify the top 25 up-regulated and down-regulated genes with more than 1.5 fold change with significant p value ( $p < 0.05$ ) by comparing triplicates of CHOPWT2.1 to CHOPWT2.2 and CHOPWT2.3. Gene list and fold changes are presented in Supplemental Table 1.

### *SNP Array Analysis*

DNA was isolated from each fibroblast and iPSC line using DNeasy Blood and Tissue Kit (Qiagen, Inc), and genotyped on the Illumina BeadChip at the Center for Applied Genomics, Children's Hospital of Philadelphia. The CHOPWT1 and CHOPWT2 fibroblast and iPSC lines were genotyped on the HumanHap610-Quad arrays with 620,901 markers, whereas the BMC fibroblast and iPSC lines were genotyped on HumanOmni1-Quad arrays with 1,140,419 markers. CNV analysis was performed using the PennCNV software<sup>5</sup> based on the signal intensity (Log R Ratio and B Allele Frequency) data exported from Illumina GenomeStudio. The default parameters were used, and only large CNVs (>200kb) were retained for subsequent analysis. The signal intensity data around all CNV calls were plotted and visually inspected to ensure accuracy. We used the scan\_region.pl program within PennCNV to determine if a CNV call is unique to an iPSC line, in comparison to the parental fibroblast as a reference.

### *iPSC differentiations into hematopoietic progenitors cells using adherent monolayer cultures*

For hematopoietic differentiation, between  $5 - 10 \times 10^4$  iPSCs were plated on matrigel (BD Biosciences) coated 6-well plates and cultured for 1-2 days in HES media supplemented with 5 ng/ml bFGF. Upon reaching ~50% confluence, differentiation was started by adding RPMI media P/S, glutamine, ascorbic acid & monothioglycerol (MTG) including BMP4 (5 ng/ml), Wnt3a (2 mM) and VEGF (50 ng/ml) for the first 2 days. Cells were maintained one additional day in RPMI media plus BMP4 (5 ng/ml), VEGF (50 ng/ml), and bFGF (20 ng/ml). On day 4,

RPML media was replaced with StemPro34 (SP34) (Invitrogen) plus BMP4 (5 ng/ml), VEGF (50 ng/ml), and bFGF (20 ng/ml). From day 4-5, SP34 media was supplemented with VEGF (15 ng/ml) and bFGF (5 ng/ml). On day 6, SP34 media was replaced by serum free media (SFD; Cheng et. al 2012) plus VEGF (50 ng/ml), IL6 (10 ng/ml), SCF (50 ng/ml), bFGF (100 ng/ml), and FLT3 ligand (5 ng/ml). On day 7-9, media was replaced daily with SFD supplemented with VEGF (50 ng/ml), IL6 (10 ng/ml), SCF (50 ng/ml), bFGF (100 ng/ml), TPO (50 ng/ml), FLT3 ligand (5 ng/ml). Non-adherent common myeloid progenitors (CMPs) were collected (day 7-9) and used in methylcellulose or megacult colony assays (Stem Cell Technologies, Inc) according to manufacturer instructions. Images were captured by the Zeiss Axioskop2 microscope (Munich, Germany) (Original magnification x20). Megakaryocyte size was determined as previously published<sup>6</sup>. The CMPs were also expanded for 4-5 days in megakaryocyte liquid culture conditions: SFD supplemented with TPO (50 ng/ml), SCF (50 ng/ml), and IL3 (10 ng/ml).

#### *Flow Cytometry*

Cells from differentiations were analyzed for the following cell surface antigens: CD31-PE-Cy7, KDR-APC, CD41-PE, CD235-APC, CD43-FITC, CD45-PB, CD42-PE, and CD18-APC as previously published<sup>7</sup> and data not shown. The cells were acquired with a FACS canto II flow cytometer (Becton Dickinson). Analysis was performed using FlowJo software (Tree Star Inc.).

Mills et al. Suppl. Table 1.

| RefseqRNA      | Gene Symbol | Fold Change |
|----------------|-------------|-------------|
| NM_016588      | NRN1        | 7.26        |
| NM_003155      | STC1        | 6.31        |
| NM_175063.4    | C19orf63    | 6.12        |
| NM_001042422.1 | SLC16A3     | 6.01        |
| NM_007000      | UPK1A       | 5.91        |
| NM_198581.2    | ZC3H6       | 5.89        |
| NM_199286      | DPPA3       | 5.79        |
| NM_003529      | HIST1H3A    | 5.46        |
| NM_001828      | CLC         | 5.30        |
| BC005107       | C21orf105   | 5.20        |
| NM_005840      | SPRY3       | 5.04        |
| NM_001172      | BNIP3       | 4.53        |
| NM_020358      | TRIM49      | 4.51        |
| NM_001678      | ATP1B2      | 4.48        |
| NC_000011.9    | LOC692247   | 4.28        |
| NM_002522      | NPTX1       | 4.13        |
| NM_138492.4    | PRELID2     | 4.02        |
| NC_000017.10   | SNORA38B    | 3.75        |
| NM_014367.3    | FAM162A     | 3.64        |
| NM_021623.1    | PLEKHA2     | 3.57        |
| NM_144670.2    | A2ML1       | 3.55        |
| NM_007261      | CD300A      | 3.32        |
| NM_020358      | LOC729384   | 3.32        |
| NM_001039      | SCNN1G      | 3.30        |
| NM_001159296.1 | KLF8        | 3.26        |
| NM_020225.1    | STOX2       | -2.18       |
| NM_018837      | SULF2       | -2.18       |
| NM_001838      | CCR7        | -2.19       |
| NM_000610      | CD44        | -2.22       |
| NM_022068.2    | FAM38B2     | -2.24       |
| NM_002442      | MSI1        | -2.24       |
| NM_021977      | SLC22A3     | -2.25       |
| NM_002167.4    | ID3         | -2.25       |
| NM_017780.2    | CHD7        | -2.26       |
| NM_001048251.1 | CMTM3       | -2.27       |
| NM_000965      | RARB        | -2.28       |
| NM_001082967.1 | FAM19A5     | -2.28       |
| NM_030753      | WNT3        | -2.28       |
| NM_153377      | LRIG3       | -2.31       |
| NM_014420      | DKK4        | -2.32       |
| NM_001025194.1 | CES1        | -2.35       |
| NM_001428      | HTR1A       | -2.40       |
| NM_000930      | PLAT        | -2.41       |
| NM_006537      | USP3        | -2.41       |
| NM_003877      | SOCS2       | -2.47       |
| NM_006183      | NTS         | -2.48       |
| NM_014344.2    | FJX1        | -2.55       |
| NM_016591      | GCNT4       | -2.57       |
| NM_014899      | RHOBTB3     | -2.57       |
| NM_178826.3    | ANO4        | -2.94       |

**Table S1. Genes differentially expressed in WT2.1 versus WT2.2 and WT2.3 with a 1.5-fold or greater difference in expression.**

## Mills et al. Supplementary Table 2

| iPSC Line | Chromosome          | Region              | Size  | Type        | No. of Genes | Genes                                                                                                                                                                                                                           |
|-----------|---------------------|---------------------|-------|-------------|--------------|---------------------------------------------------------------------------------------------------------------------------------------------------------------------------------------------------------------------------------|
| CHOPWT1.1 | hg7(q11.22)         | 69817650-70852210   | 760KB | Duplication | 2            | Auts2, WBSCR17 (MIR3914-1, MIR3914-2)                                                                                                                                                                                           |
| CHOPWT1.2 | hg7(q11.22)         | 69817650-70852210   | 760KB | Duplication | 2            | Auts2, WBSCR17 (MIR3914-1, MIR3914-2)                                                                                                                                                                                           |
| CHOPWT1.3 | hg5 (q34)           | 167069407-167222548 | 200KB | Duplication | 1            | ODZ2                                                                                                                                                                                                                            |
|           | hg3 (q26.32)        | 175046386-176164717 | 1.3MB | Duplication | 1            | NAALADL2                                                                                                                                                                                                                        |
| CHOPWT2.1 | hg3(q26.32)         | 176682972-176892871 | 200KB | Deletion    | 1            | TBL1XR1                                                                                                                                                                                                                         |
|           | hg6(q21)            | 111242190-112175075 | 1MB   | Duplication | 10           | GTF3C6, RPF2, GSTM2P1, SLC16A10, KIAA1919, REV3L, TRAF3IP2-AS1, AF216583, TRAF3IP2, FYN                                                                                                                                         |
|           | hg16(q23.3)         | 82329444-82701613   | 372KB | Duplication | 8            | CDH13, HSBP1, MLYCD, OSGIN1, NECAB2, EFCBP2, SLC38A8, MBTPS1                                                                                                                                                                    |
|           | hg20 (q11.1-q11.21) | 29311279-30545148   | 1.2MB | Duplication | 29           | FRG1B, MLLT10P1, DEFB115, DEFB116, DEFB118, DEFB119, DEFB121, DEFB121, DEFB122, DEFB123, DEFB124, BC016143, REM1, LINC00028, TRNA_Pseudo, HM13, PSIMCT-1, ID1, COX4I2, BCL2L1, TPX2, MYLK2, FOXS1, DUSP15, TTLL9, U1, (MIR3193) |
| CHOPWT2.2 | No Changes Detected |                     |       |             |              | None                                                                                                                                                                                                                            |
| CHOPWT2.3 | hg6(q21)            | 110835963-111057837 | 200KB | Duplication | 3            | DDO, SLC22A16, CDC2L6                                                                                                                                                                                                           |
|           | hg6(q21)            | 111442009-112506443 | 1MB   | Duplication | 11           | SLC16A10, KIAA1919, REV3L, TRAF3IP2-AS1, AF216583, TRAF3IP2, FYN, WISP3, LAMA4, TUBE1, C6orf225                                                                                                                                 |
|           | hg14 (q21.3)        | 50311239-50656217   | 346KB | Duplication | 7            | NEMF, ARF6, AK092589, C14orf182, C14orf183, METTL21D, SOS2                                                                                                                                                                      |
| BMC1      | No Changes Detected |                     |       |             |              | None                                                                                                                                                                                                                            |
| BMC2      | No Changes Detected |                     |       |             |              | None                                                                                                                                                                                                                            |
| BMC3      | hg3 (q24.1)         | 29557812-29765655   | 200KB | Deletion    | 1            | RBMS3                                                                                                                                                                                                                           |

\*CNVs were determined using parental fibroblast as reference to determine the number of de novo generated subchromosomal aberrations acquired during the reprogramming process.

**Table S2.** DNA copy number variations (CNVs) in iPSC Lines.

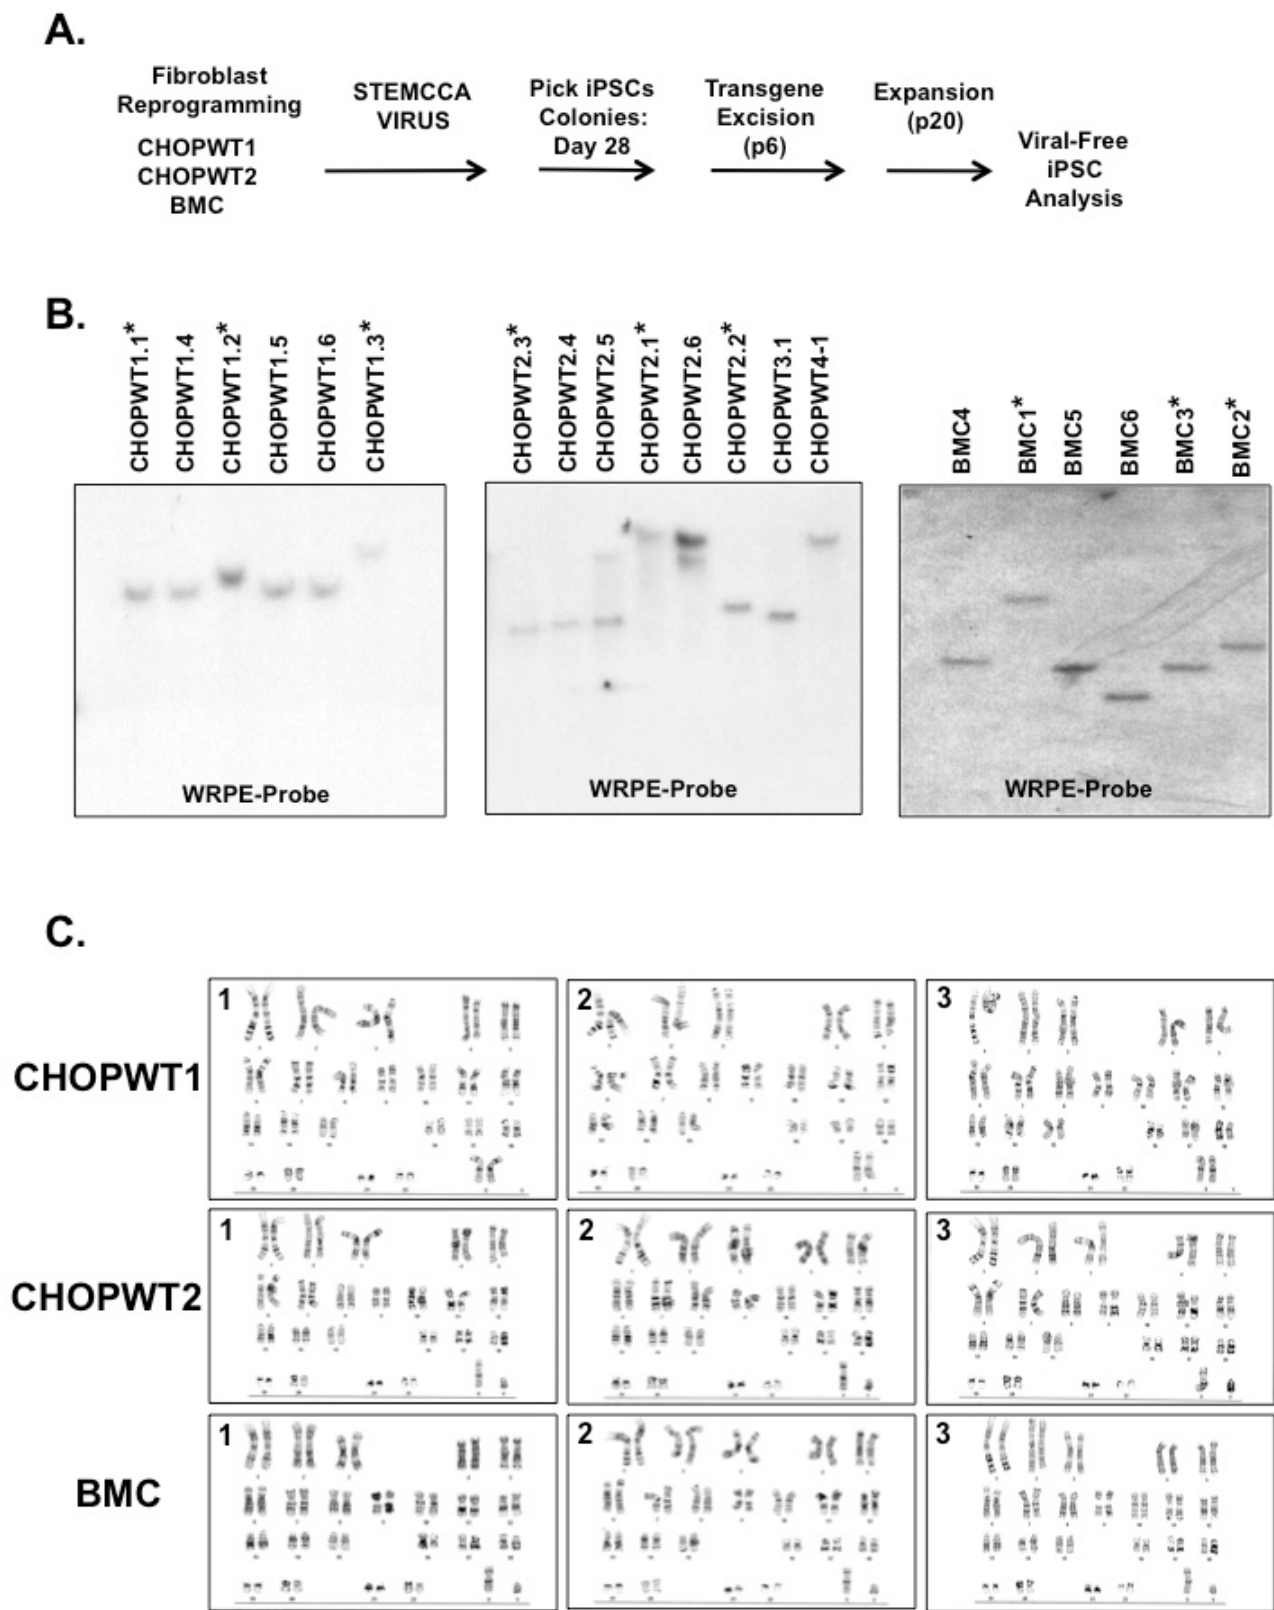

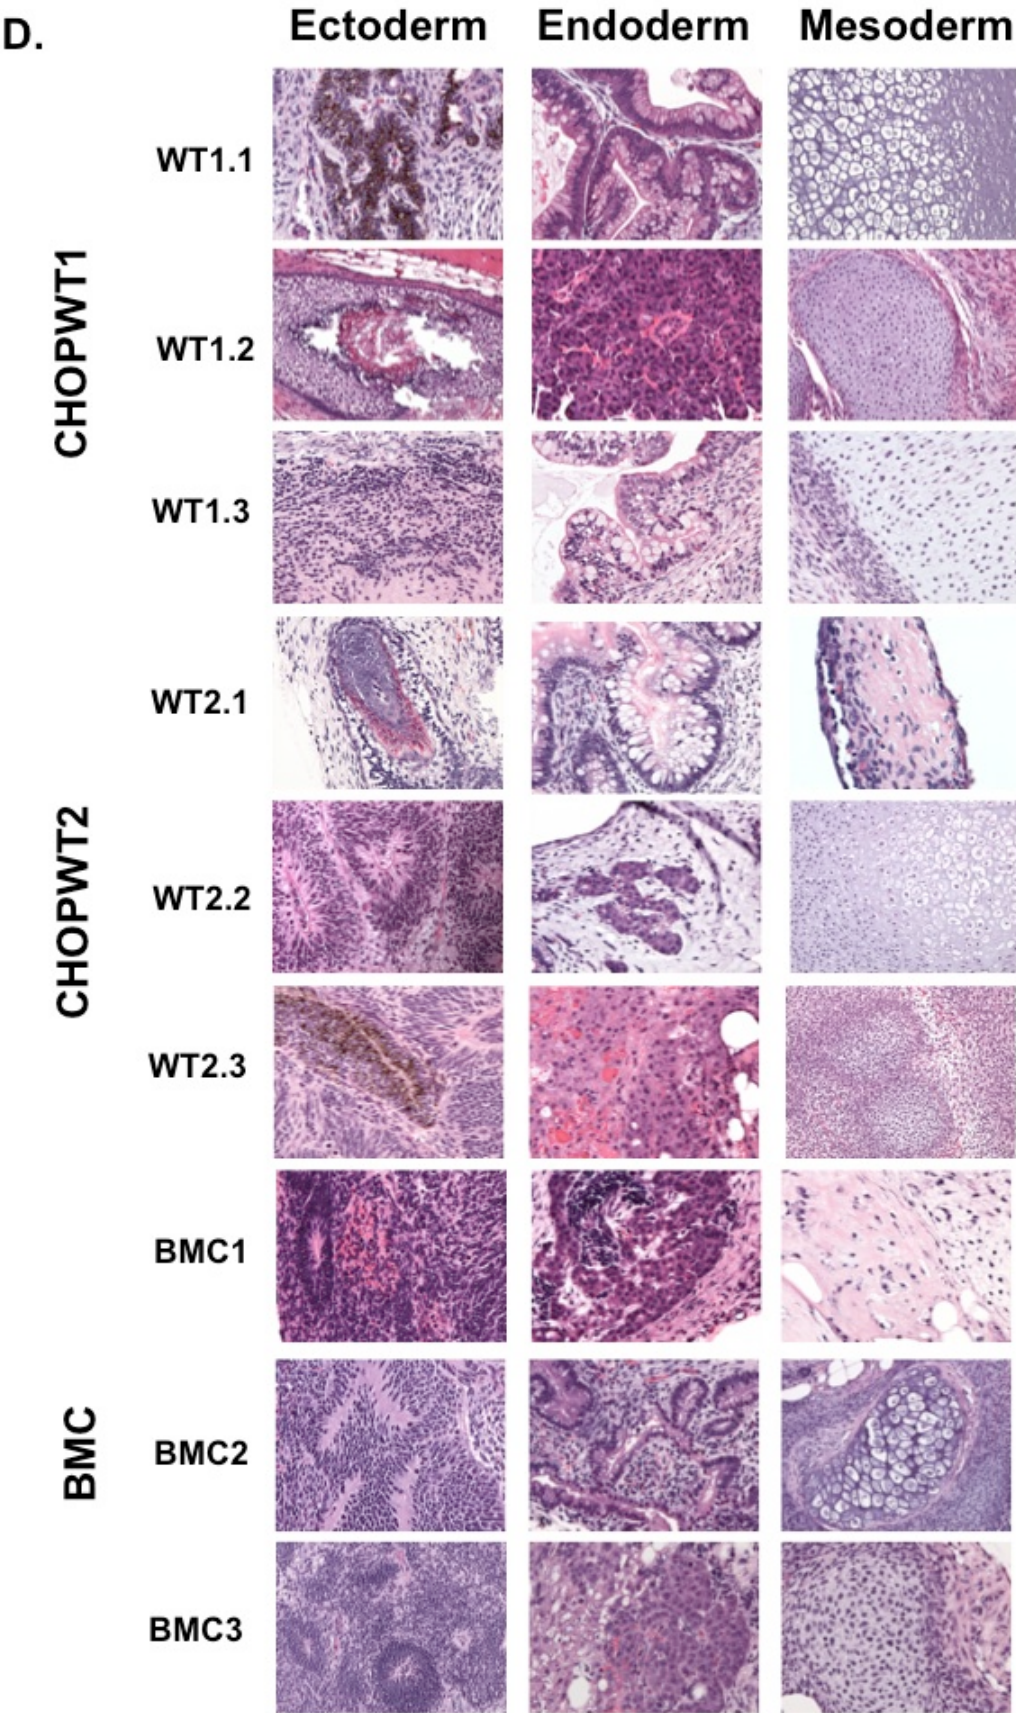

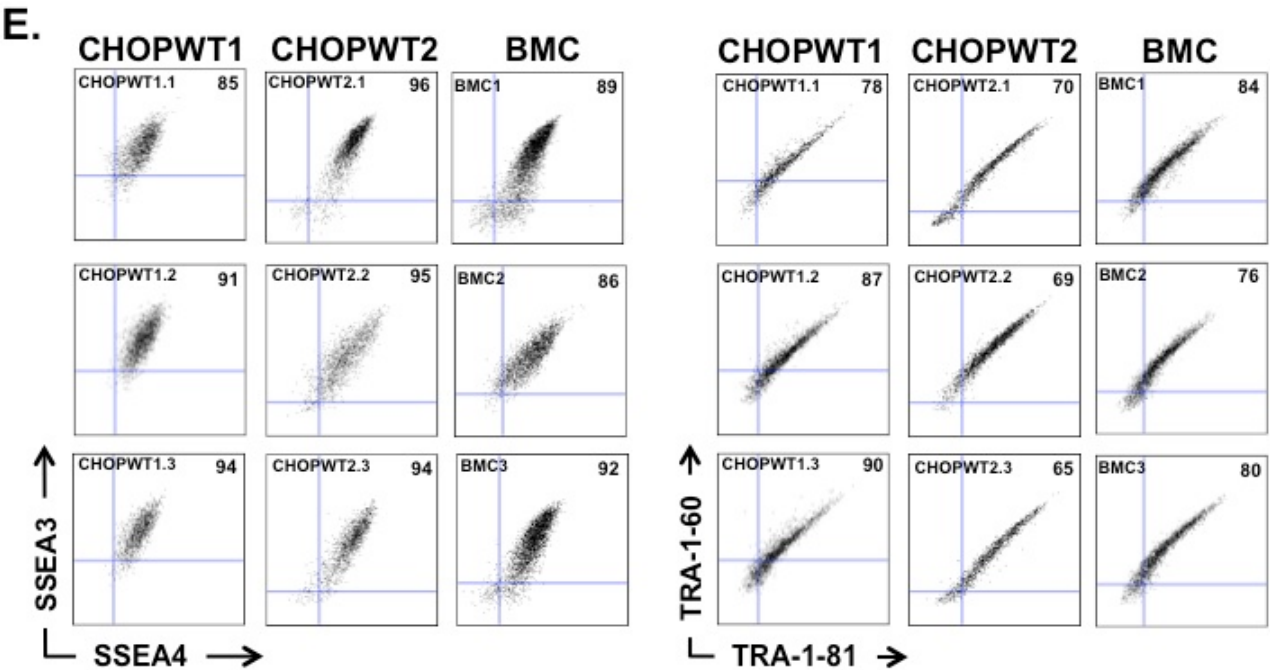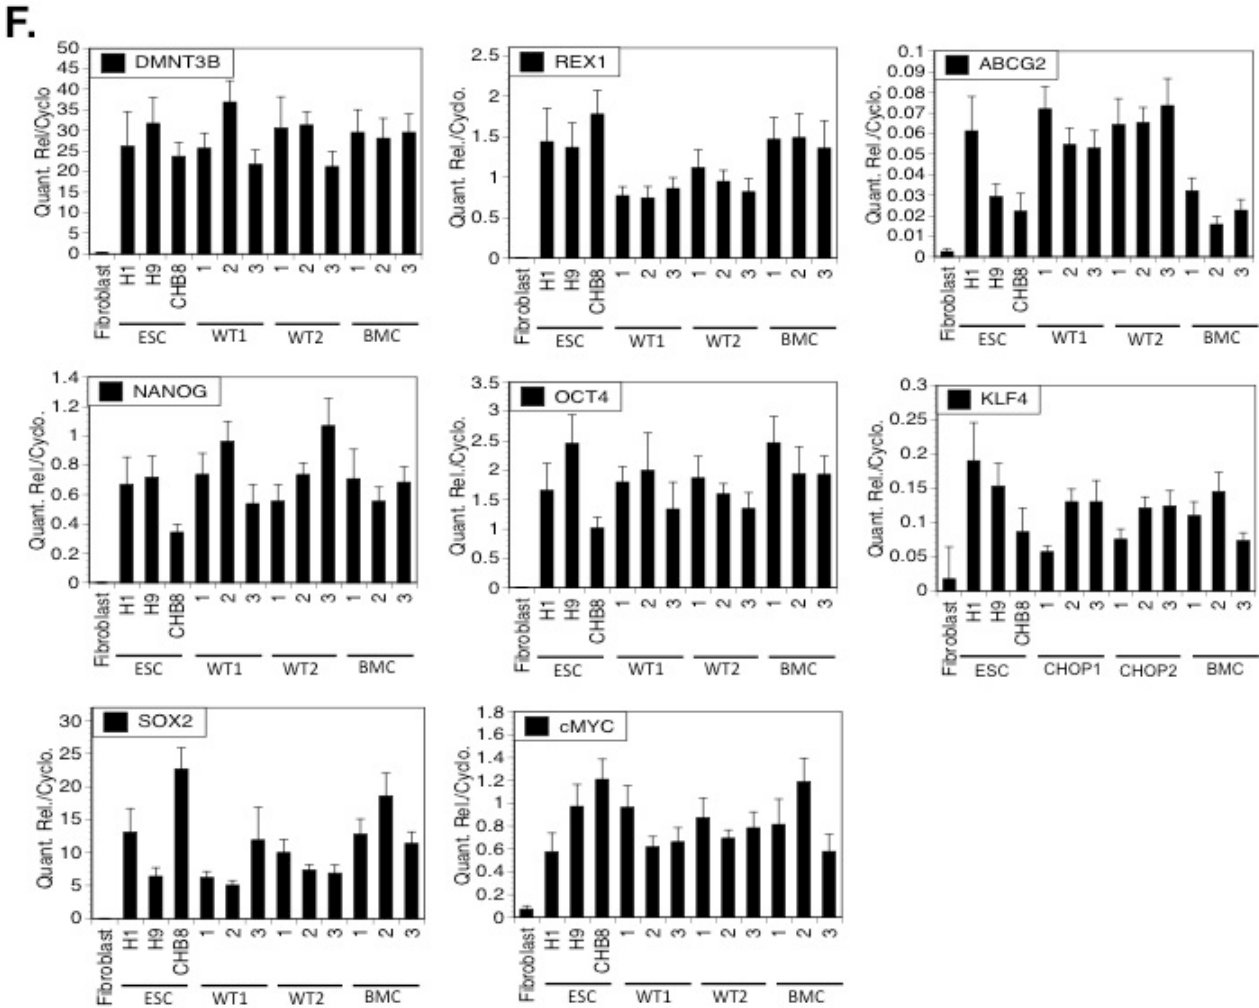

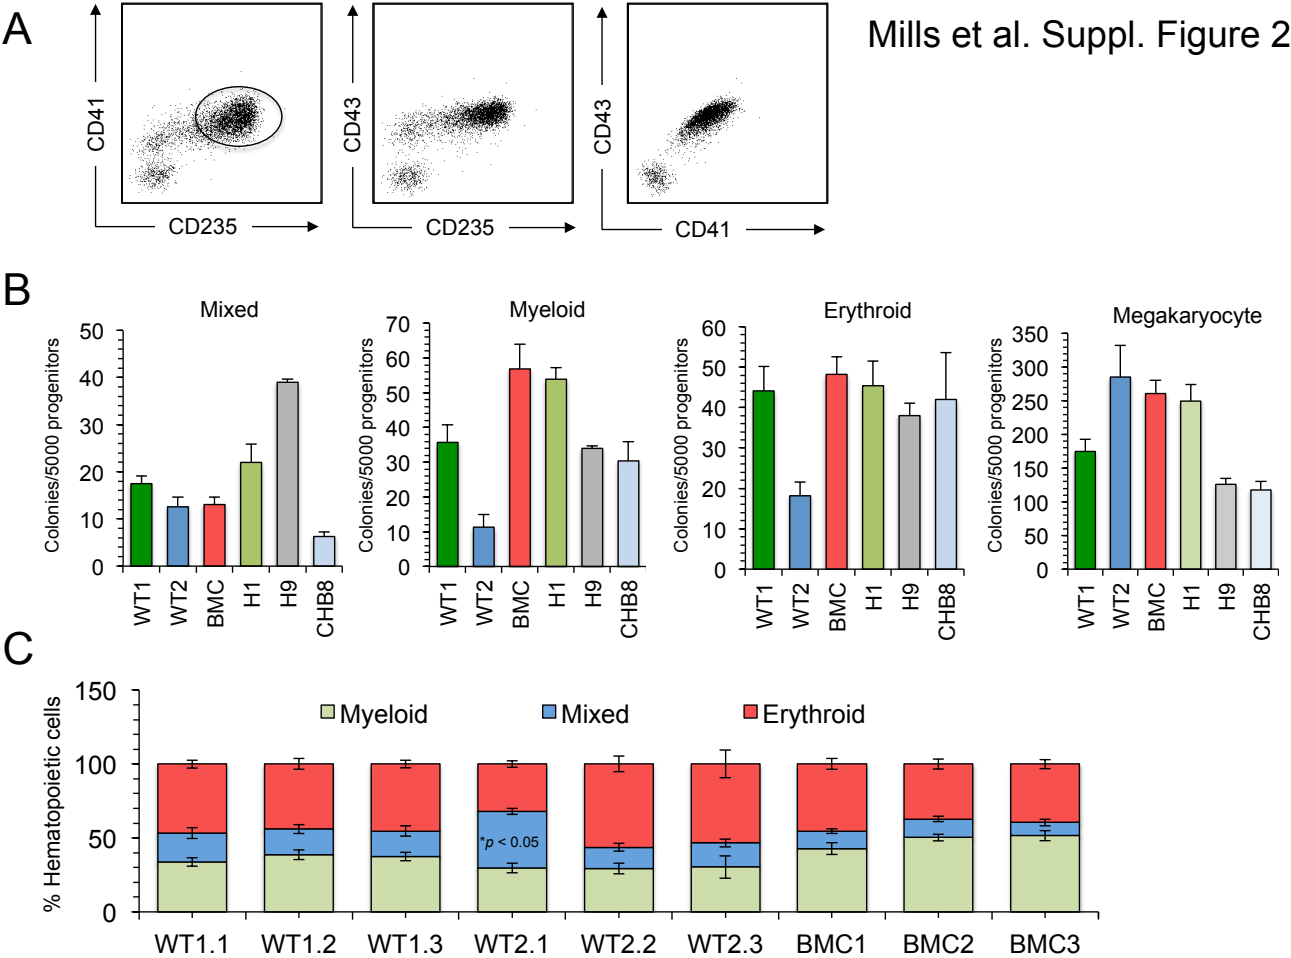

Mills et al. Suppl. Figure 2

**Figure S1.** Characterization of fibroblast-derived iPSC clones. (A) Schema for generation of viral-free fibroblast-derived iPSC using STEMCCA cassette. (B) Southern blot analysis of single integration of STEMCCA cassette using WRPE probe. (C) Karyotype analysis of all iPSC clones showing a normal diploid G-band analysis. (D) Generation of all three germ layers in teratoma assay: ectoderm, mesoderm, and endoderm. The images were captured by the Zeiss Axioskop2 microscope (Munich, Germany) (Original magnification x20-40). (E) Expression of pluripotent surface antigen expression, SSEA3/SSEA4 and TRA-1-60/TRA-1-81, using flow cytometry. (F) Molecular profiles of iPSC lines. Real-time PCR analysis shows the expression of common pluripotency genes: DNMT3B, REX1, ABCG2, OCT4, NANOG, SOX2, cMYC, KLF4.

**Figure S2.** Hematopoietic potential of iPSC lines. (A) Flow cytometry analysis showing CD43+CD41+CD235+ hematopoietic progenitors cells (HPCs) released into media from adherent culture at day 7. The absolute numbers of HPCs added to colony assays were quantified using expression of CD41+CD235+CD43+ cells. (B) Methylcellulose and MegaCult assay: Colony count from HPCs as shown in part A and examined for mixed (multi-lineage colony formation), myeloid, erythrocyte, and megakaryocyte colonies. Data shown are averaged from 3 iPSC lines per individual, and 3 human ESCs were used to allow comparison across different genetic backgrounds (iPSCs: WT1: CHOPWT1.1, CHOPWT1.2 and CHOPWT2.3; WT2: CHOPWT2.1, CHPWT2.2, CHOPWT2.3; BMC: BMC1, BMC2, and BMC3; ESCs: H1, H9, and CHB8) (mean  $\pm$  SEM for n=3 (iPSC); n=2 (ESC)). (C) Methylcellulose assay: Distribution of lineage-committed cells in adherent hematopoietic cultures at day 7 of differentiation for all iPSC lines, myeloid (green), mixed (blue), and erythrocyte (red) colonies (mean  $\pm$  SEM for n=3; \* $p$  < 0.05).

**References:**

1. Somers A, Jean J-C, Sommer CA, et al. Generation of Transgene-Free Lung Disease-Specific Human iPS Cells Using a Single Excisable Lentiviral Stem Cell Cassette. *Stem Cells*. 2010;28:1728–1740.
2. Polo JM, Liu S, Figueroa ME, et al. Cell type of origin influences the molecular and functional properties of mouse induced pluripotent stem cells. *Nature Biotechnology*. 2010;28:848-855.
3. Ohi Y, Qin H, Hong C, et al. Incomplete DNA methylation underlies a transcriptional memory of somatic cells in human iPS cells. *Nature cell biology*. 2011;13(5):541-549.
4. De Hoon MJL, Imoto S, Nolan J, Miyano S. Open Source Clustering Software. 2004. *Bioinformatics*. 2004;20(9):1453-1454
5. Wang K, Mingyao L, Hadley D, et al. PennCNV: An integrated hidden Markov model designed for high-resolution copy number variation detection in whole-genome SNP genotyping data. *Genome Research*. 2007;17:1665-1674.
6. Tanaka R, Koike K, Imai T, et al. Stem cell factor enhances proliferation, but not maturation of murine megakaryocytic progenitors in serum-free culture. *Blood*. 1992;80(7):1743-1749.
7. Chou ST, Byrsk-Bishop M, Tober JM, et al. Trisomy 21-associated defects in human primitive hematopoiesis revealed through induced pluripotent stem cells. *Proc Natl Acad Sci U S A*. 2012;109(43):17573-17578.
